# Supplementary material for: A La3+-selective metallohydrogel with a facile gelator of a phenylalanine derivative containing an imidazole group
Source: Royal Society of Chemistry journal article supplement (doi:10.1039/c8dt03557a), 2018-01-01
Supplement: c8dt03557a1.pdf [file c8dt03557a1.pdf]

## Supporting Information

### **A La<sup>3+</sup>-selective metallohydrogel with a facile gelator of phenylalanine derivative containing an imidazole group**

Chuan-Wan Wei <sup>a</sup>, Xiao-Juan Wang <sup>a\*</sup>, Shu-Qin Gao <sup>b</sup>, Ge-Bo Wen <sup>b</sup>, and Ying-Wu Lin <sup>a,b\*</sup>

<sup>a</sup>. *School of Chemistry and Chemical Engineering, University of South China, Hengyang 421001, China; E-mail: 1052961032@qq.com; linlinying@hotmail.com*

<sup>b</sup>. *Laboratory of Protein Structure and Function, University of South China, Hengyang 421001, China.*

## Contents

### 1. Experimental Section

|                                            |      |
|--------------------------------------------|------|
| 1.1 Reagents                               | p.S3 |
| 1.2 Synthesis of ImF ligands               | p.S3 |
| 1.3 Preparation of La-ImF metallohydrogels | p.S4 |
| 1.4 ITC studies                            | p.S4 |
| 1.5 UV-Vis studies                         | p.S4 |
| 1.6 SEM, TEM, ESI-MS and NMR studies       | p.S5 |
| 1.7 Fluorescence studies                   | p.S5 |

### 2. Supplementary Figures

|                                                                                                                                                |       |
|------------------------------------------------------------------------------------------------------------------------------------------------|-------|
| <b>Fig. S1.</b> ESI-MS spectrum of compound ImF.                                                                                               | p.S6  |
| <b>Fig. S2</b> $^1\text{H}$ NMR spectrum of compound ImF in $\text{D}_2\text{O}$ .                                                             | p.S6  |
| <b>Fig. S3</b> The synthesis of MF-Gel at MGC ( $\text{C}_{\text{ImF}}=20\text{ mM}$ ), pH 5-8.                                                | p.S7  |
| <b>Fig. S4</b> Digital photos of ImF in complex with different metal ions.                                                                     | p.S7  |
| <b>Fig. S5</b> Time-dependent UV-Vis spectra of ImF in complex with $\text{La}^{3+}$ .                                                         | p.S7  |
| <b>Fig. S6</b> Digital photos of ImF-La gels prepared by using $\text{LaCl}_3$ , $\text{La}(\text{NO}_3)_3$ and $\text{La}_2(\text{SO}_4)_3$ . | p.S8  |
| <b>Fig. S7</b> Dynamic frequency sweep of fresh ImF-gel and La-ImF metallohydrogel.                                                            | p.S8  |
| <b>Fig. S8</b> Plot of Tgel of ImF-gel and La-ImF in different concentrations.                                                                 | p.S9  |
| <b>Fig. S9</b> The step strain experimental data obtained from La-ImF metallohydrogel.                                                         | p.S9  |
| <b>Fig. S10</b> (A) TEM image of La-ImF metallohydrogel (MGC), SEM images of (B) ImF aqueous solution (10 mM), and (C) ImF-Gel (MGC).          | p.S10 |
| <b>Fig. S11</b> ITC studies of ImF with $\text{La}(\text{NO}_3)_3$ , $\text{LaCl}_3$ and $\text{La}_2(\text{SO}_4)_3$ .                        | p.S10 |
| <b>Fig. S12</b> ESI-MS spectrum of ImF-La( $\text{NO}_3$ ) $_3$ complex.                                                                       | p.S11 |
| <b>Fig. S13</b> Excitation spectrum of La-ImF complex.                                                                                         | p.S11 |
| <b>Fig. S14</b> Fluorescence spectra of ImF and its complexes with various metal ions.                                                         | p.S12 |
| <b>Fig. S15</b> Digital photos of the absorption of MO and MB by the La-ImF metallohydrogel, and the corresponding UV-Vis spectral changes.    | p.S12 |

## 1. Experimental Section

### 1.1 Reagents

Phenylalanine (Phe) and sodium borohydride ( $\text{NaBH}_4$ ) were purchased from Aladin Reagent (Shanghai, China), 1H-Imidazole-4-carbaldehyde was purchased from Xiensi Reagent (Tianjin, China) and was used without further purification. All other reagents were of analytical grade, which include  $\text{Na}_2\text{CO}_3$ ,  $\text{HCl}$ ,  $\text{KOH}$ ,  $\text{NaBH}_4$ ,  $\text{MgCl}_2$ ,  $\text{CaCl}_2$ ,  $\text{CdCl}_2$ ,  $\text{Pb}(\text{Ac})_2$ ,  $\text{ZnSO}_4 \cdot 6\text{H}_2\text{O}$ ,  $\text{Ni}(\text{Ac})_2 \cdot 6\text{H}_2\text{O}$ ,  $\text{CoCl}_2 \cdot 5\text{H}_2\text{O}$ ,  $\text{FeCl}_3$ ,  $\text{Cu}(\text{Ac})_2 \cdot \text{H}_2\text{O}$ ,  $\text{MnSO}_4$ ,  $\text{La}(\text{NO}_3)_3 \cdot 6\text{H}_2\text{O}$ ,  $\text{LaCl}_3$ ,  $\text{La}_2(\text{SO}_4)_3$ ,  $\text{Ce}(\text{NO}_3)_3 \cdot 6\text{H}_2\text{O}$ ,  $\text{Pr}(\text{NO}_3)_3 \cdot 6\text{H}_2\text{O}$ ,  $\text{Nd}(\text{NO}_3)_3 \cdot 6\text{H}_2\text{O}$ ,  $\text{Sm}(\text{NO}_3)_3 \cdot 6\text{H}_2\text{O}$ ,  $\text{Eu}(\text{NO}_3)_3 \cdot 6\text{H}_2\text{O}$ ,  $\text{Gd}(\text{NO}_3)_3 \cdot 6\text{H}_2\text{O}$ ,  $\text{Tb}(\text{NO}_3)_3 \cdot 5\text{H}_2\text{O}$ ,  $\text{Dy}(\text{NO}_3)_3 \cdot 5\text{H}_2\text{O}$ ,  $\text{Er}(\text{NO}_3)_3 \cdot 5\text{H}_2\text{O}$ ,  $\text{Y}(\text{NO}_3)_3 \cdot 5\text{H}_2\text{O}$  and  $\text{Lu}(\text{NO}_3)_3 \cdot 6\text{H}_2\text{O}$ . Deionized water (MillQ, 18.2  $\text{M}\Omega$ ) was used.

### 1.2 Synthesis of ImF ligands

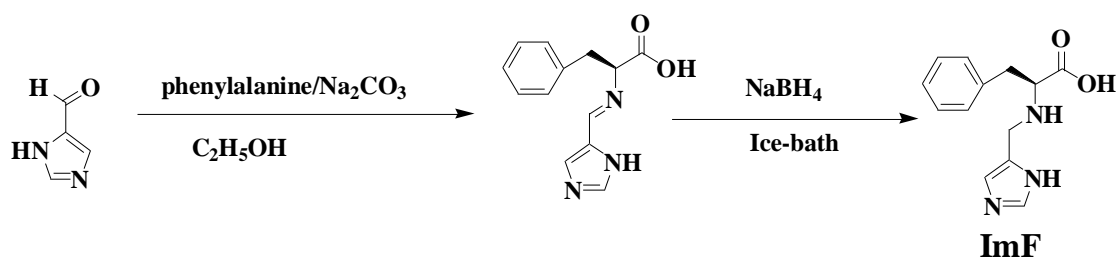

**Scheme S1.** Synthetic route of ImF.

Preparation of ImF: The compound ImF was prepared following a modified literature procedure<sup>[1,2]</sup>. To an aqueous solution (10 mL) of Phe (0.83 g, 5 mM) containing  $\text{Na}_2\text{CO}_3$  (0.53 g, 5 mM), 1H-Imidazole-4-carbaldehyde (0.48 g, 5 mM) in  $\text{CH}_3\text{CH}_2\text{OH}$  (5 mL) was added slowly. The solution was stirred for 3 h at 40°C. Then the solution was cooled in an ice bath.  $\text{NaBH}_4$  (0.23 g, 6 mM) was added to the solution slowly. The mixture was stirred for 3 h, and 6 mol  $\text{L}^{-1}$  hydrochloric acid was used to neutralize the basic (pH~10) reaction mixture and the pH was adjusted to 5.0-6.0. The mixture system was stirred further for 2 h. The resulting solid was filtered off, and was washed with ethanol and water, then dried.

ESI-MS (Q-TOF): calc. for  $\text{C}_{13}\text{H}_{15}\text{N}_3\text{O}_2$  245.11, observed 244.11  $[\text{M} - \text{H}]^-$ , 282.07  $[\text{M} + \text{K} - 2\text{H}]^-$ .

$^1\text{H}$  NMR (500 MHz,  $\text{D}_2\text{O}$ , ppm):  $-\text{CH}_2$  (2.93-2.94, d, 2H).  $-\text{CH}$  (3.35-3.38, 1H),  $-\text{CH}_2$  (3.67-3.88, dd, 2H), Im-H (6.87, 1H), Phe-H (7.26-7.37, m, 5H), Im-H (7.47, 1H).

### ***1.3 Preparation of La-ImF metallohydrogels***

La-ImF metallohydrogel was prepared by mixing ImF solution (12 mM,  $\sim\text{pH}$  5-8) and  $\text{La}(\text{NO}_3)_3$  solution with ratio of 2:1 (volume). The mixture was changed into a white metallohydrogel after shaking for several seconds.

### ***1.4 ITC studies***

Isothermal titration calorimetry (ITC) measurements were performed on a Microcal VP-ITC microcalorimeter (GE life sciences). Both ImF and  $\text{La}(\text{NO}_3)_3$  solution were thoroughly degassed in a ThermoVal apparatus (Microcal). For titration experiments,  $\sim 1.5$  mL  $\text{La}(\text{NO}_3)_3$ ,  $\text{LaCl}_3$  or  $\text{La}_2(\text{SO}_4)_3$  (25 mM) solution was placed in the reaction cell, and a solution of ImF (1 mM) was injected over 20 s with a total of 25 injections (10  $\mu\text{L}$  for per injection), with a 150 s interval between each injection. The reaction cell was continuously stirred at 502 rpm, and heat changes were recorded at 298.15 K. The data were analyzed and the binding isotherm was fitted to a single-site model in the Origin 7.0 software (GE life sciences).

### ***1.5 UV-Vis studies***

UV-Vis spectral changes of methyl orange (MO) and methylene-blue (MB) in presence of La-ImF complex were recorded in deionized water on a Hewlett-Packard 8453 diode array spectrometer. The reduction of MO and MB in La-ImF complex, respectively, was performed by monitoring the UV-Vis spectral changes for 0-30 h.

### ***1.6 SEM, TEM, ESI-MS and NMR studies***

Scanning electron microscope (SEM) images were obtained on a FEI HELIOS NanoLab 600i SEM (America). Transmission electron microscope (TEM) images were obtained from a FEI Titan microscope (America). La-ImF complex and ImF

complex mass spectrum measurement were obtained by using Xevo G2-XS QTof mass spectrometer (Waters, America). The La-ImF complex and ImF complex were dissolved in water and then passed through a 0.22  $\mu\text{m}$  membrane filtration. NMR experiments were performed by using AMX-500 (Bruker, Switzerland).

### ***1.7 Fluorescence spectral studies***

Fluorescence spectral measurements were performed on a Fluorescence spectrometer (F-7000, Hitachi). The samples were prepared by mixing ImF solution (5 mM) and various lanthanide salt solutions (5 mM) with ratio of 2:1 (volume).

### **Reference**

- (1) Wang, X.; Wei, C.; Su, J. H.; He, B.; Wen, G. B.; Lin, Y. W.; Zhang, Y. *Angew. Chem. Int. Ed.* **2018**, 57: 3504-3508.
- (2) Wang, X.; He, T.; Yang, L.; Wu, H.; Zhang, R.; Zhang, Z.; Shen, R.; Xiang, J.; Zhang, Y.; Wei, C. *Nanoscale*, **2016**, 8: 6479-6483.

## 2. Supplementary Figures

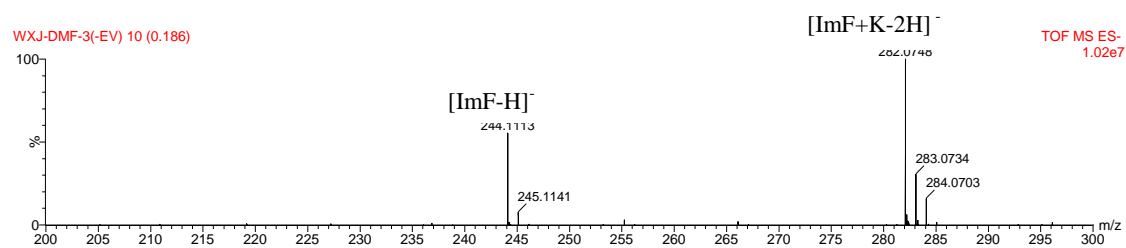

**Fig. S1** ESI-MS spectra of compound ImF, Calculated: 245.1086 Da; Observed: 244.1113 Da ([ImF -H]<sup>-</sup>), and 282.0748 Da ([ImF+K-2H]<sup>-</sup>).

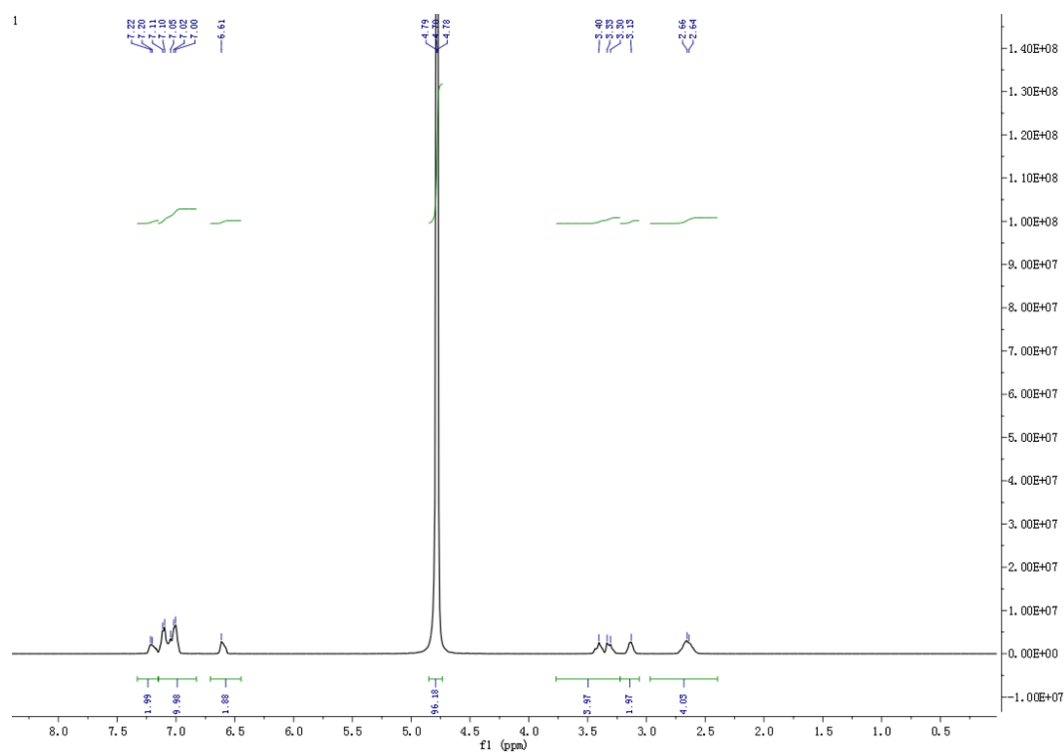

**Fig. S2** <sup>1</sup>H NMR (500 MHz) spectrum of compound ImF in D<sub>2</sub>O.

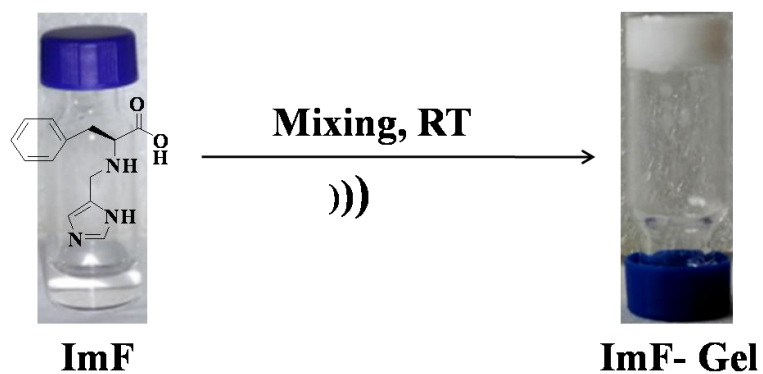

**Fig. S3** The synthesis of ImF-Gel at MGC ( $C_{\text{ImF}} = 20 \text{ mM}$ ), pH 5-8.

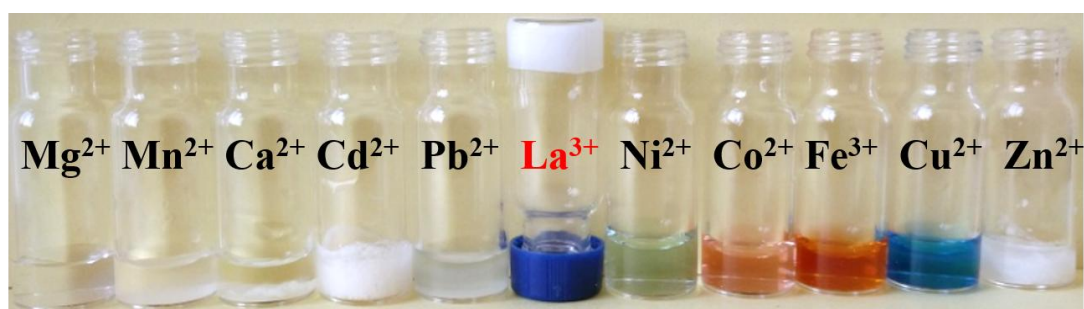

**Fig. S4** Digital photos of ImF in complex with different metal ions.

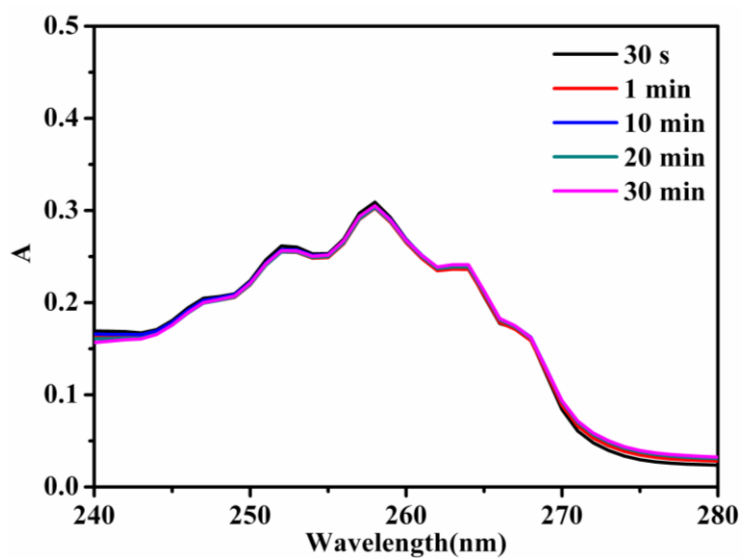

**Fig. S5** Time-dependent UV-Vis spectra of ImF in complex with  $\text{La}(\text{NO}_3)_3$  (The concentration of all solutions is 3 mM,  $n(\text{ImF})/n(\text{La}^{3+}) = 2:1$ ).

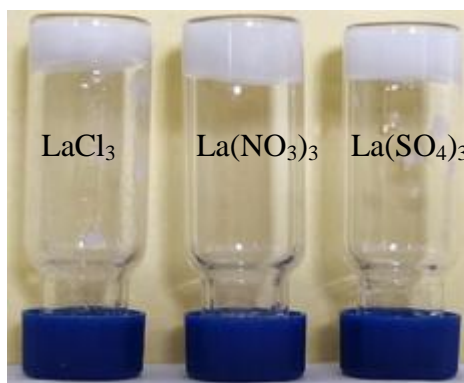

**Fig. S6** Digital photos of La-ImF gels prepared by using  $\text{LaCl}_3$  (left),  $\text{La}(\text{NO}_3)_3$  (middle), and  $\text{La}_2(\text{SO}_4)_3$  (right).

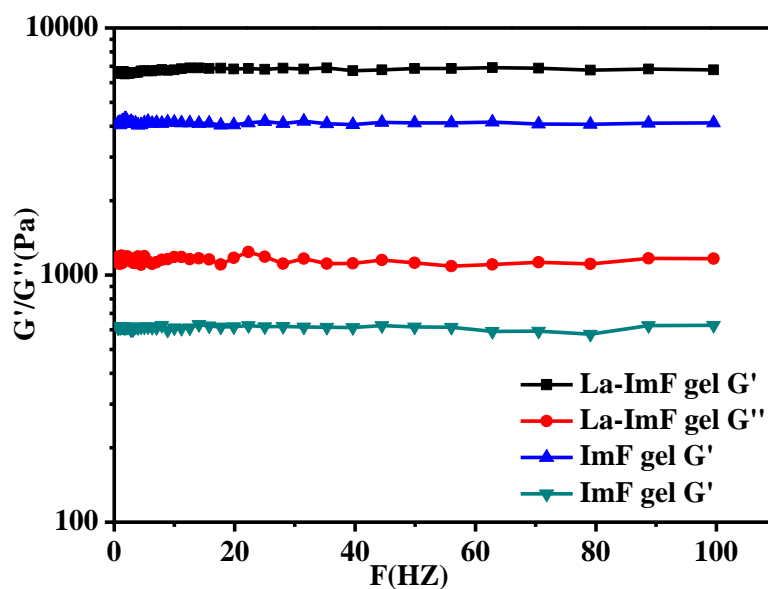

**Fig. S7** Dynamic frequency sweep of fresh ImF-gel and La-ImF metallohydrogel at their respective MGC, measured at 0.1% strain.



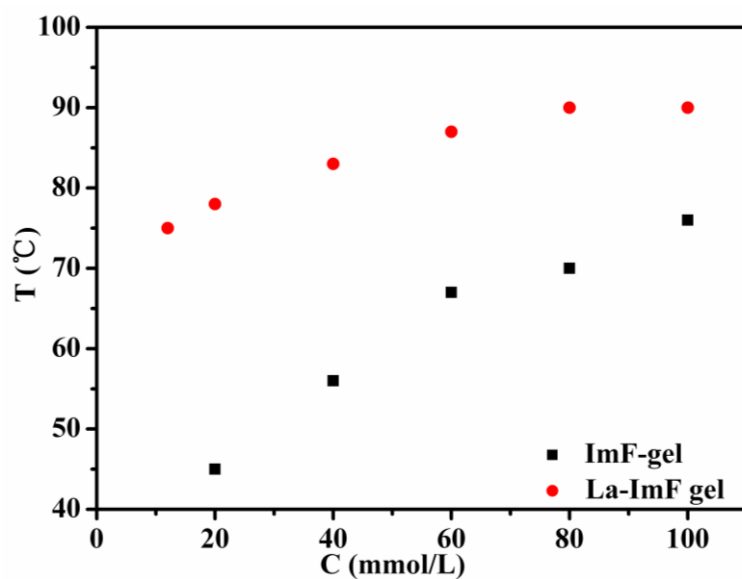

**Fig. S8** Plot of Tgel of ImF-gel and La-ImF in different concentrations (12, 20, 40, 60, 80 and 100 mM).

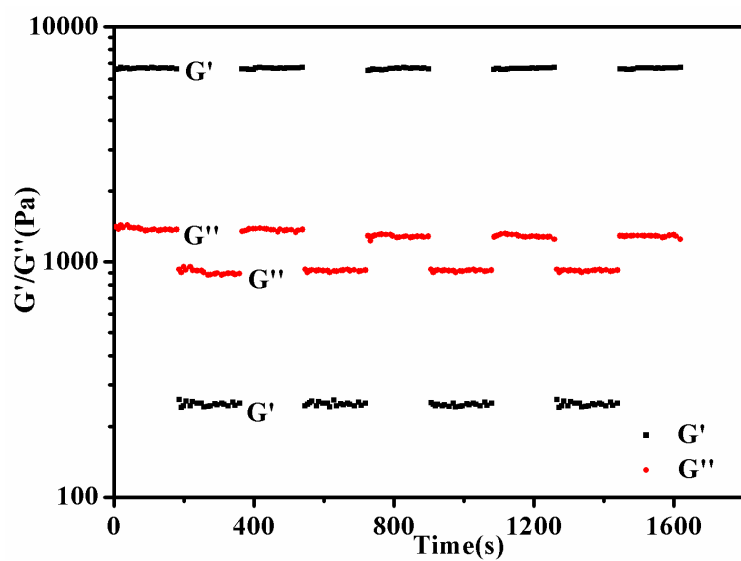

**Fig. S9** The step strain experimental data obtained from La-ImF metallohydrogel. The concentration was maintained at MGC ( $n(\text{ImF})/n(\text{La}^{3+}) = 2:1$ , strain = 0.1%).

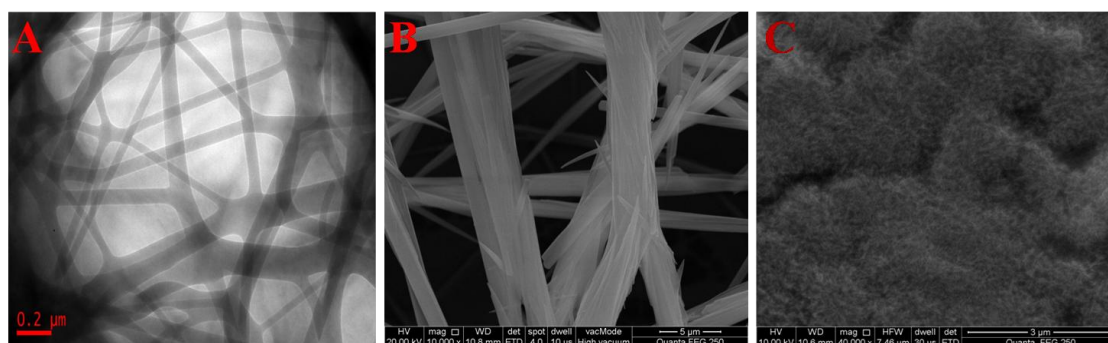

**Fig. S10** (A) TEM image of La-ImF metallohydrogel (MGC), SEM images of (B) ImF aqueous solution (10 mM), and (C) ImF-Gel (MGC).

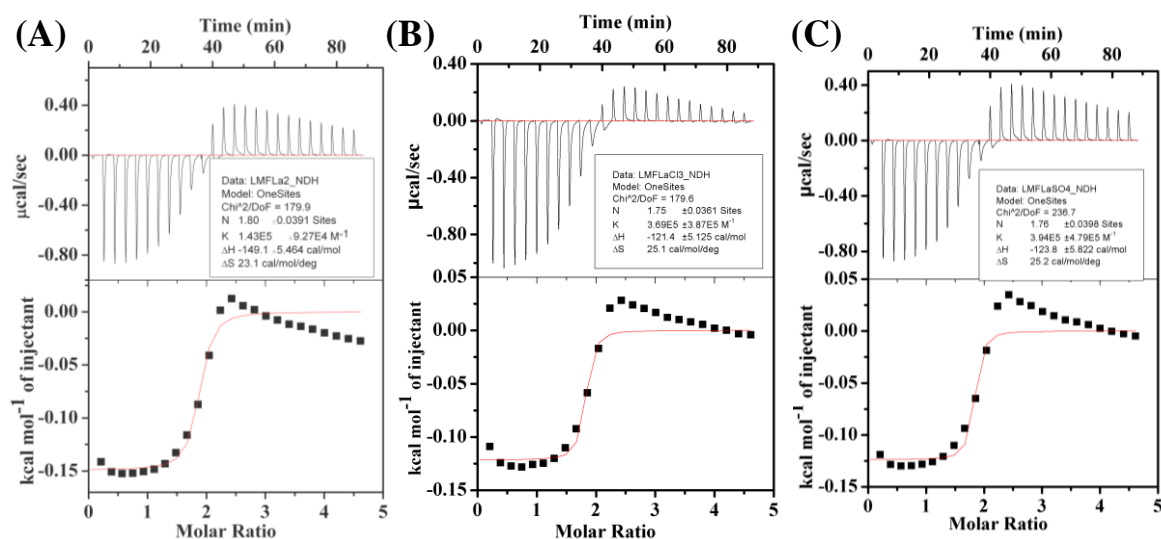

**Fig. S11** Microcalorimetric titration of ImF with (A)  $\text{La}(\text{NO}_3)_3$ , (B)  $\text{LaCl}_3$ , and (C)  $\text{La}_2(\text{SO}_4)_3$  in water at 298.15 K. (Top) Raw ITC data for 25 sequential injections (10  $\mu\text{L}$  per injection) of  $\text{La}(\text{NO}_3)_3$  solution (25 mM) into ImF solution (1 mM). (Bottom) Net reaction heat obtained from the integration of the calorimetric traces.

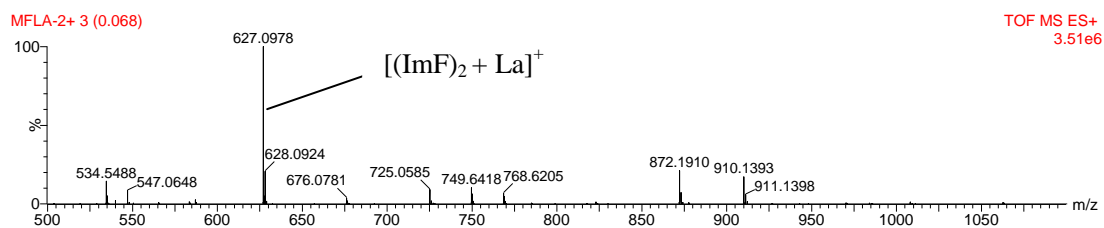

**Fig. S12** ESI-MS spectra of ImF- $\text{La}(\text{NO}_3)_3$ :  $[(\text{ImF})_2 + \text{La}]$  Calculated: 627.1235 Da; Observed: 627.0978 ( $[(\text{ImF})_2 + \text{La}]^+$ ), 872.1910 Da ( $[(\text{ImF})_3 + \text{La}]^+$ ) and 910.1393 Da ( $[(\text{ImF})_3 + \text{La} + \text{K} - \text{H}]^+$ ).

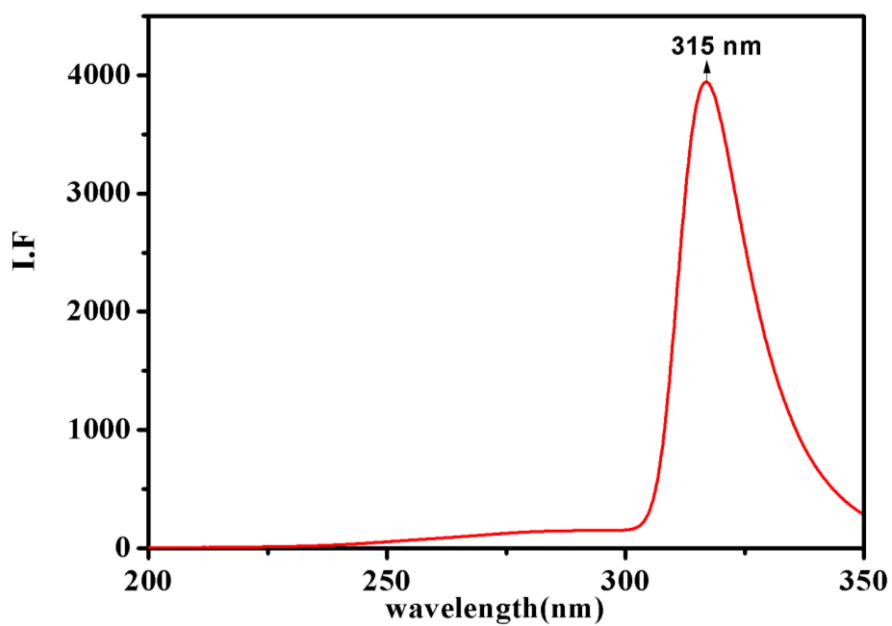

**Fig. S13** Excitation spectrum of La-ImF complex.

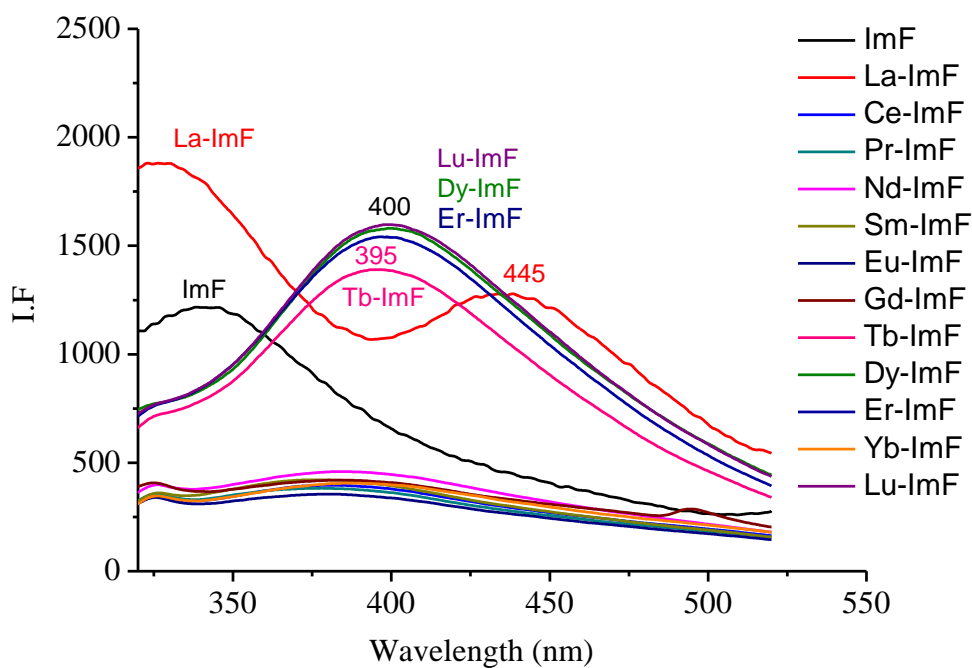

**Fig. S14** Fluorescence spectra of ImF and its complexes with various lanthanide ions ( $\lambda_{\text{ex}} = 315 \text{ nm}$ ).

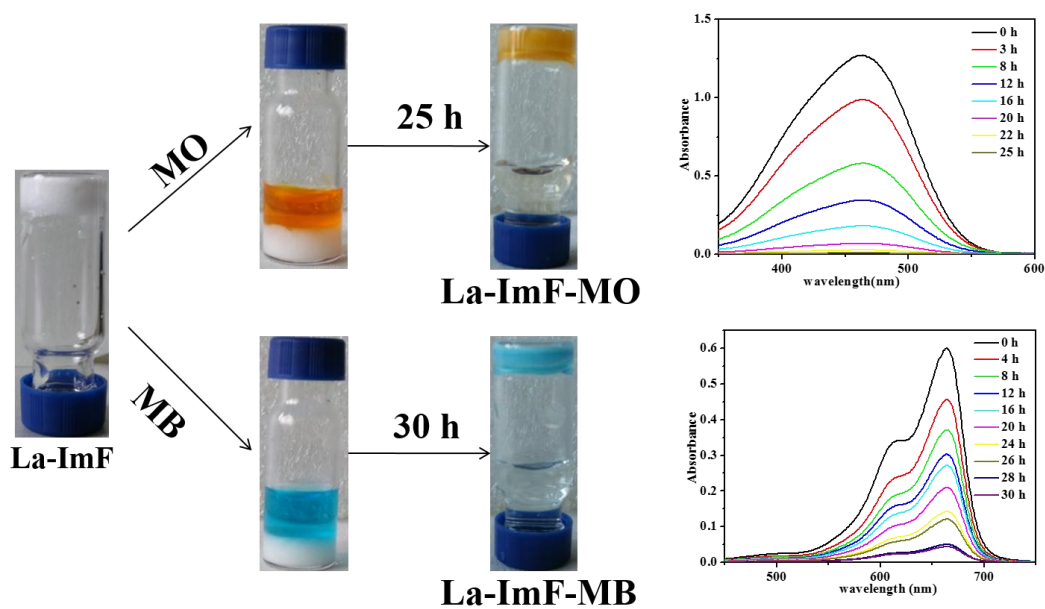

**Fig. S15** Digital photos of the absorption of MO and MB by the La-ImF metalhydrogel, and the corresponding UV-Vis spectral changes over time.
